# Supplementary material
Source: Springer Nature journal article supplement (https://www.springermedizin.de/resource/supplementary/12933_2002_3_MOESM4_ESM.pdf/9538100)

# ENDOTHELIAL CELL

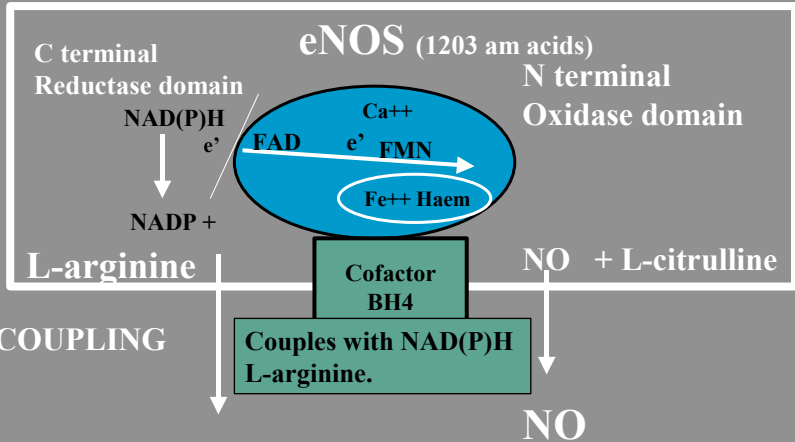

Diabetes: A net producer of [O<sub>2</sub>' ]  
Due to uncoupling of eNOS enzyme.

Supplement: MOESM4 [file 9538100]
